# Supplementary material for: Targeted and Systemic therapies for recurrent adult ependymomas: real- world outcomes from a single institution and concise literature review
Source: Research Square preprint supplement (doi:10.21203/rs.3.rs-7862583/v1), 2025-10-30
Supplement: Supplementary file 1 [file 3fc37ceed17ea16d1ef74db7.docx]

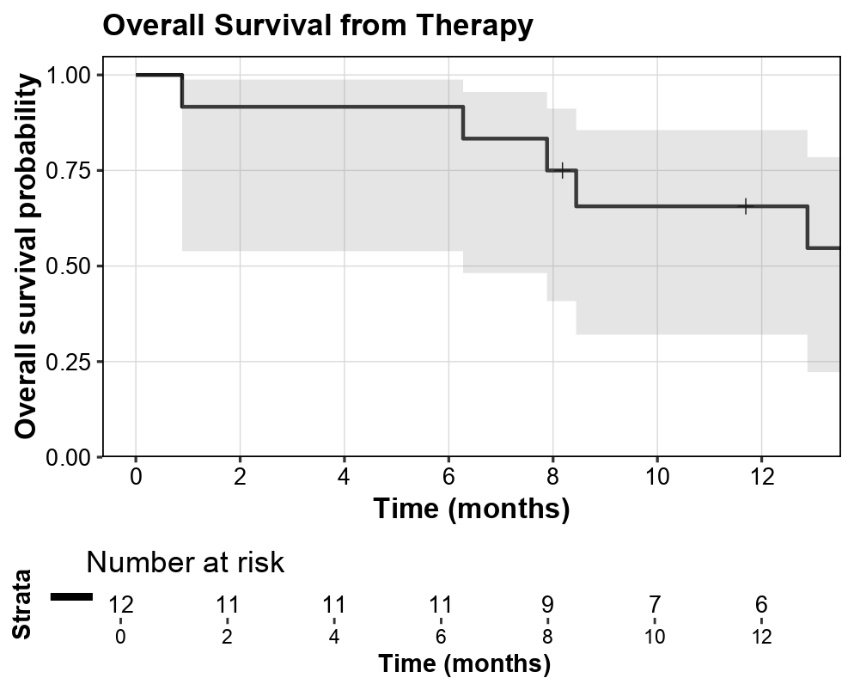
**Figure S1.** Overall Survival from Diagnosis

**Fig S1**. Kaplan–Meier curve showing overall survival probability from the date of diagnosis in the study cohort (n = 12). The shaded area represents the 95% confidence interval. Vertical tick marks indicate censored cases.

**Figure S2.** Overall Survival from Therapy


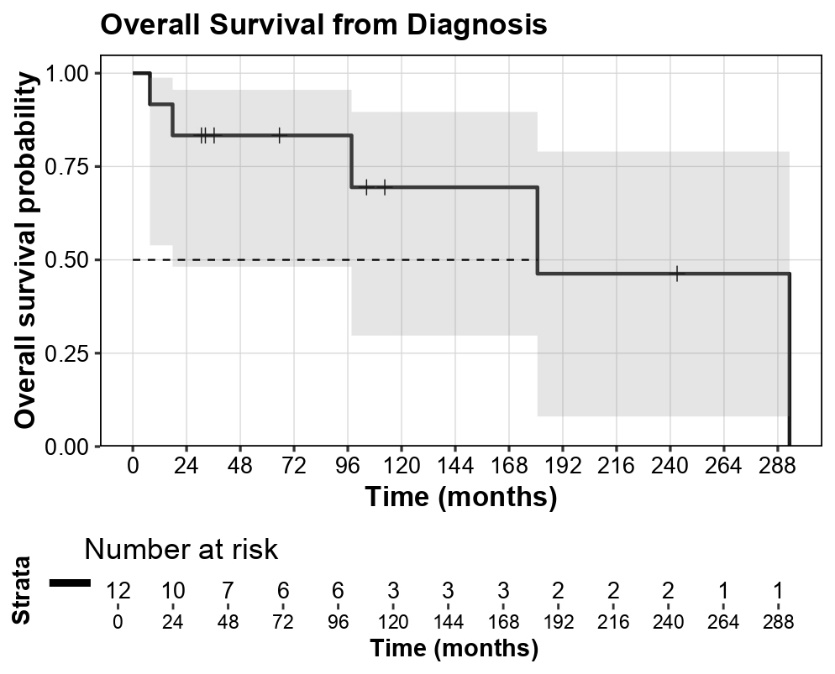


**Figure S2**. Kaplan–Meier curve showing overall survival probability from the start of systemic therapy (n = 12). The shaded area represents the 95% confidence interval. Vertical tick marks indicate censored cases.
